# Supplementary material for: Implementation of an intermediate complexity snow-physics scheme (ISBA-Explicit Snow) into a sea-ice model (SI 3 ): 1D thermodynamic coupling and validation
Source: Copernicus journal article supplement (doi:10.5194/egusphere-2024-3220), 2025-02-04
Supplement: Supplementary file 1 [file egusphere-2024-3220-supplement.pdf]

## Supporting materials

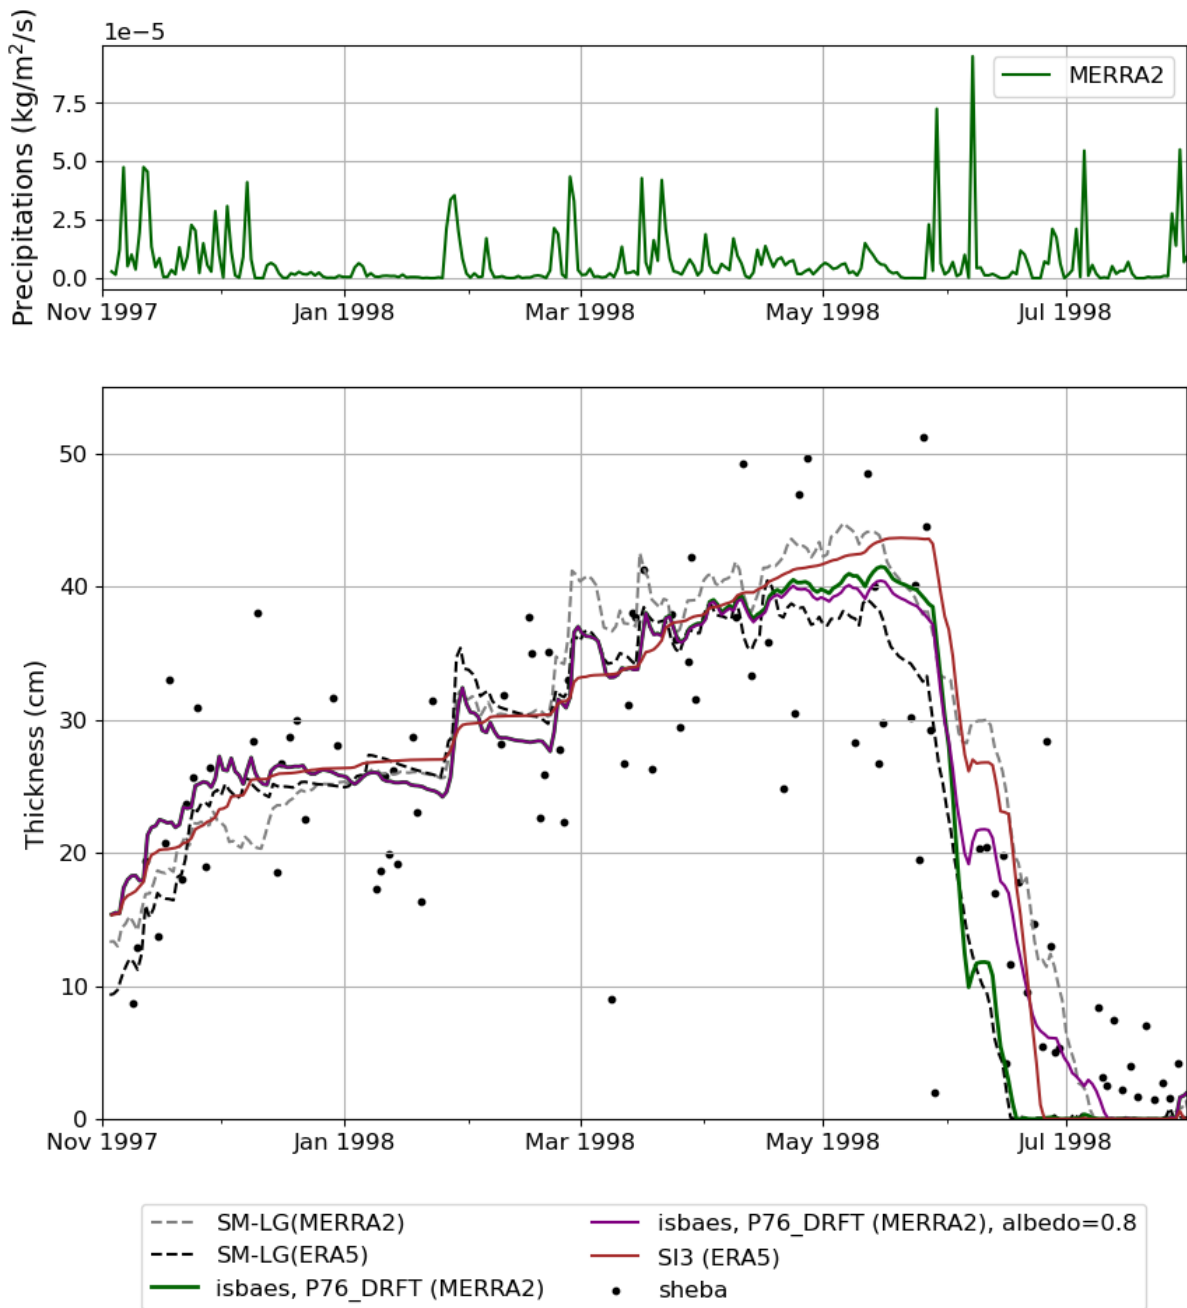

**Figure S1: Observed (black dots) and simulated (lines) snow thickness at SHEBA during the November 1997 - September 1998 period. The purple line represents the snow thickness for a simulation using the P76\_DRFT configuration, but for which the albedo is fixed to 0.8. This simulation is more consistent with SM-LG(MERRA2) during the melt period.**
